# High-Throughput Sequencing, Characterization and Detection of New and Conserved Cucumber miRNAs

Germán Martínez<sup>1</sup>, Javier Forment<sup>1</sup>, Cesar Llave<sup>2</sup>, Vicente Pallás<sup>1</sup>, Gustavo Gómez<sup>1\*</sup>

**1** Instituto de Biología Molecular y Celular de Plantas (IBMCP), Consejo Superior Investigaciones Científicas (CSIC) - Universidad Politécnica de Valencia (UPV), Valencia, Spain, **2** Centro de Investigaciones Biológicas (CIB), Consejo Superior Investigaciones Científicas (CSIC), Madrid, Spain

## Abstract

Micro RNAs (miRNAs) are a class of endogenous small non coding RNAs involved in the post-transcriptional regulation of gene expression. In plants, a great number of conserved and specific miRNAs, mainly arising from model species, have been identified to date. However less is known about the diversity of these regulatory RNAs in vegetal species with agricultural and/or horticultural importance. Here we report a combined approach of bioinformatics prediction, high-throughput sequencing data and molecular methods to analyze miRNAs populations in cucumber (*Cucumis sativus*) plants. A set of 19 conserved and 6 known but non-conserved miRNA families were found in our cucumber small RNA dataset. We also identified 7 (3 with their miRNA\* strand) not previously described miRNAs, candidates to be cucumber-specific. To validate their description these new *C. sativus* miRNAs were detected by northern blot hybridization. Additionally, potential targets for most conserved and new miRNAs were identified in cucumber genome. In summary, in this study we have identified, by first time, conserved, known non-conserved and new miRNAs arising from an agronomically important species such as *C. sativus*. The detection of this complex population of regulatory small RNAs suggests that similarly to that observe in other plant species, cucumber miRNAs may possibly play an important role in diverse biological and metabolic processes.

**Citation:** Martínez G, Forment J, Llave C, Pallás V, Gómez G (2011) High-Throughput Sequencing, Characterization and Detection of New and Conserved Cucumber miRNAs. PLoS ONE 6(5): e19523. doi:10.1371/journal.pone.0019523

**Editor:** Sue Cotterill, St. Georges University of London, United Kingdom

**Received:** February 3, 2011; **Accepted:** March 31, 2011; **Published:** May 16, 2011

**Copyright:** © 2011 Martínez, et al. This is an open-access article distributed under the terms of the Creative Commons Attribution License, which permits unrestricted use, distribution, and reproduction in any medium, provided the original author and source are credited.

**Funding:** This work was supported by grant BIO2008-03528 from the Spanish granting agency DGICYT and by grant ACOMP/2010/214 from the Generalitat Valenciana. The funders had no role in study design, data collection and analysis, decision to publish, or preparation of the manuscript.

**Competing Interests:** The authors have declared that no competing interests exist.

\* E-mail: ggomez@ibmcp.upv.es

## Introduction

The discovery of MicroRNAs (miRNAs) is a milestone in the development of modern biology. MiRNAs are a class of endogenous ~21 nucleotide (nt) small non-coding RNA (sncRNA) presents in both plants and animals. In plants, mature miRNAs are processed by the DICER-LIKE 1 (DCL1) RNase III-like protein from a longer nuclear-localized RNA transcript that forms a fold-back stem-loop structure of partially complementary double-stranded RNA (dsRNA). miRNAs regulate gene expression in a sequence-specific manner via degradation of target mRNAs or inhibition of protein translation [1,2]. Increasing evidence indicates that miRNAs, together with other non-coding RNA families, play major roles in plant development and response to biotic and abiotic stress [3]. Initially, miRNAs were identified by conventional low-scale sequencing of cDNA clones from small RNA libraries prepared from different plant sources.

Subsequent studies showed that a significant subset of plant miRNAs are strictly conserved across different species within the plant kingdom [4]. Alternatively it was also reported that a smaller proportion of miRNAs, often expressed at low levels, were absent in diverse species suggesting that they could have evolved more recently [5]. As a result, non-conserved miRNAs that are rarely retrieved from low-scale sequencing experiments remain poorly characterized in most plant species. However, the recent irruption of high-throughput sequencing technologies has allowed deeper sampling of the small RNA populations enabling the identification

of a substantial number of non-conserved miRNAs in diverse vegetal-species [6–11].

At least, two criteria involving expression and biogenesis parameters have been adopted for miRNA annotation [12,13]. A primary criterion establishes that candidate miRNAs should be supported by in vivo detection or cloning of the ~21-nucleotide miRNA/miRNA\* duplex that arise from the stem of a single-stranded, stem-loop precursor [13]. Second, the satisfaction of one or more of the follow ancillary criteria can increase the confidence of a miRNA annotation: (i) the fold-back structure should be phylogenetically conserved; (ii) the precursor should be shown to accumulate in organisms with impaired Dicer function; and (iii) the expression of the predicted miRNAs should be validated by *Northern blot* hybridization and/or PCR amplification [12]. Inspired in these annotation criteria, to date, more than 2,500 conserved and recently evolved species-specific miRNAs have been deposited in the miRNA Registry Database (miRBase Release 16.0, September 2010; <http://microrna.sanger.ac.uk/>).

Cucumber (*Cucumis sativus* L.) is among the 20 most important vegetable crops worldwide (<http://faostat.fao.org>), and it has been proposed as a model plant for vascular and sexual development studies [14,15]. However, despite of its agronomic and biological importance and the recent publication of the complete genome [16], miRNAs in cucumber have not been reported yet. To take advantage of the recently published sequence data of endogenous small-RNAs recovered from cucumber [17], here we combined bioinformatics with high-throughput sequencing data to provide

the first inventory of cucumber miRNAs population. We identified 25 previously described plant-miRNA families as well as 7 additional unknown miRNAs. The accumulation of a representative set of conserved and new cucumber miRNAs was experimentally validated by northern blot assays, using non-isotopic miRNA-specific probes.

## Results

### Analysis of *C. sativus* sRNA population

Starting from a cDNA library of short sRNAs from *C. sativus* containing 209,331 high quality sequences [17] we selected 38,747

non-redundant reads recovered from cucumber leaves with lengths of 18 to 30 nts to analyze the general profile of cucumber sRNAs. This data set was analyzed using the online University of East Anglia plant sRNA toolkit [18].

Size distribution of unique sequences is summarized in Fig. 1. The majority of the reads (82.62%) were in the range of 20 to 24 nt in length, with 24 nts (51.15%) being the most represented class of non-redundant species followed by 23 (10.40%), 22 (9.81%) and 21 nt (9.08%). This result was consistent with that previously reported for other plant species such as *Arabidopsis*, *Medicago truncatula*, *Oriza sativa*, *Populus spp.* and *Citrus trifoliata* where 24-nt sRNAs dominate the sRNA transcriptome

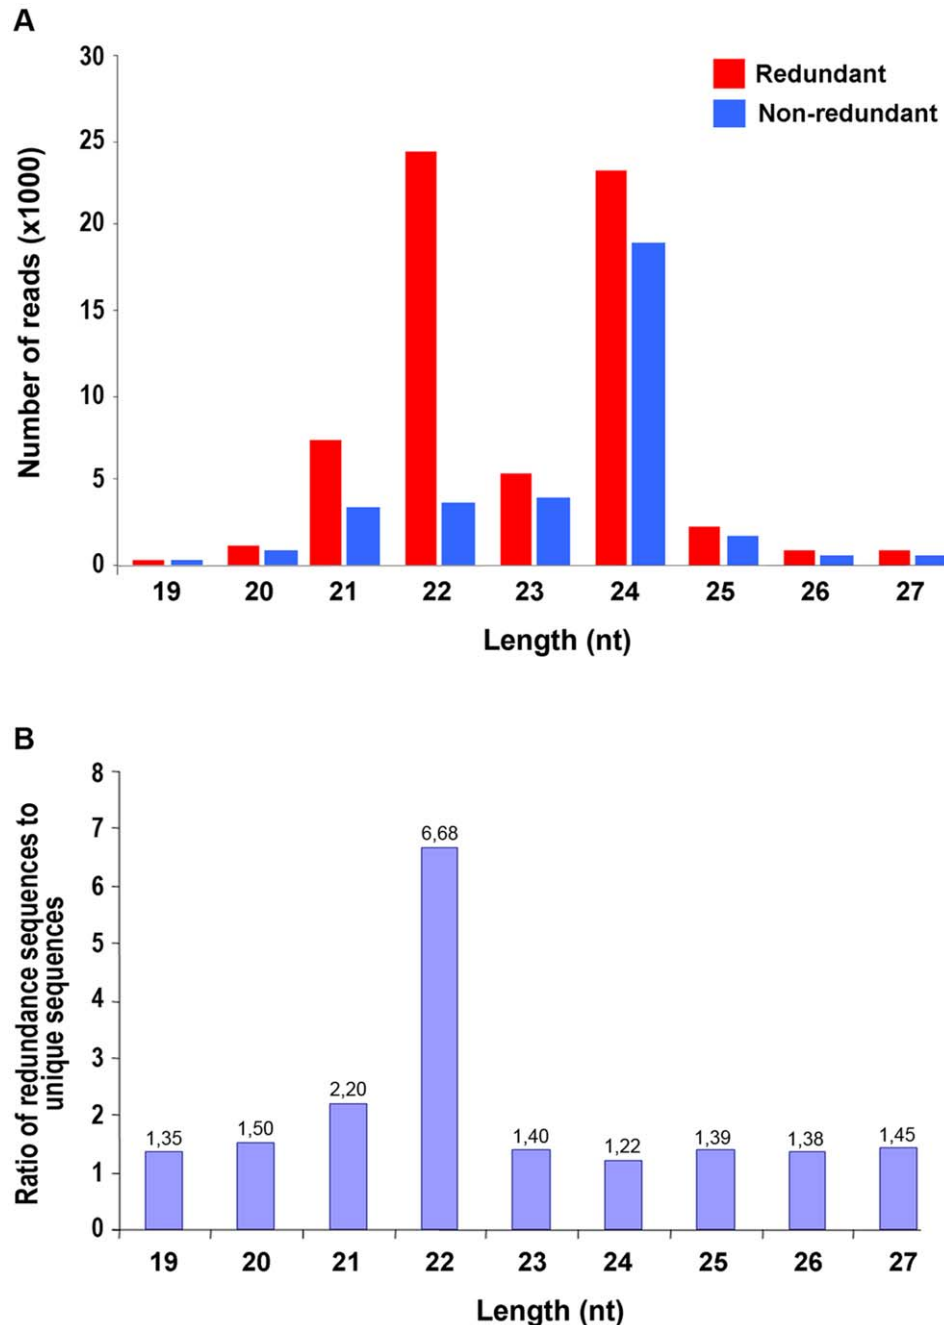

**Figure 1. Size distribution of small RNAs (sRNAs) sequences.** A) The number of redundant (red bars) and non-redundant (blue bars) sequences recovered from the *C. sativus* sRNA library is expressed as thousand units. B) Redundancy ratio for cucumber sRNAs. doi:10.1371/journal.pone.0019523.g001

**Table 1.** Known micro RNAs (miRNAs) recovered from our *C. sativus* sRNA library.

| miRNA family         | Size range | 5' end    | miRNA* | Homology by specie |          |                |           |              |            |     |
|----------------------|------------|-----------|--------|--------------------|----------|----------------|-----------|--------------|------------|-----|
|                      |            |           |        | A.thaliana         | O.sativa | P.trichocharpa | R.comunis | M.truncatula | V.vinifera |     |
| <b>Conserved</b>     |            |           |        |                    |          |                |           |              |            |     |
| miR156               | 20–23      | U (68%)   | Yes    | Yes                | Yes      | Yes            | Yes       | Yes          | Yes        | Yes |
| miR159               | 19–23      | U (77%)   | No     | Yes                | Yes      | Yes            | Yes       | Yes          | Yes        | Yes |
| miR160               | 20–21      | U (100%)  | Yes    | Yes                | Yes      | Yes            | Yes       | Yes          | Yes        | Yes |
| miR164               | 20–21      | U (67%)   | No     | Yes                | Yes      | Yes            | Yes       | Yes          | Yes        | Yes |
| miR165               | 21         | U (100%)  | No     | Yes                | Yes      | No             | No        | No           | No         | No  |
| miR166               | 21–22      | U (100%)  | Yes    | Yes                | Yes      | Yes            | Yes       | Yes          | Yes        | Yes |
| miR167               | 21–23      | U (87%)   | No     | Yes                | Yes      | Yes            | Yes       | Yes          | Yes        | Yes |
| miR168               | 21–22      | U (75%)   | Yes    | Yes                | No       | Yes            | Yes       | Yes          | Yes        | Yes |
| miR169               | 21–23      | U (75%)   | Yes    | Yes                | No       | Yes            | No        | No           | No         | Yes |
| miR171               | 19–23      | U (65%)   | Yes    | Yes                | Yes      | Yes            | Yes       | Yes          | Yes        | Yes |
| miR172               | 19–21      | A/G (50%) | Yes    | Yes                | Yes      | Yes            | Yes       | Yes          | Yes        | Yes |
| miR319               | 20–21      | U (100%)  | No     | Yes                | No       | Yes            | Yes       | Yes          | Yes        | Yes |
| miR390               | 19–21      | A (75%)   | Yes    | Yes                | Yes      | Yes            | Yes       | Yes          | Yes        | Yes |
| miR393               | 21–23      | U (100%)  | No     | Yes                | Yes      | Yes            | Yes       | Yes          | Yes        | Yes |
| miR396               | 21–22      | U (100%)  | Yes    | Yes                | Yes      | Yes            | Yes       | Yes          | Yes        | Yes |
| miR397               | 21         | C (50%)   | No     | Yes                | Yes      | Yes            | Yes       | No           | No         | Yes |
| miR398               | 20–21      | U (100%)  | No     | Yes                | Yes      | Yes            | Yes       | Yes          | Yes        | Yes |
| miR399               | 21         | U (100%)  | No     | Yes                | No       | No             | No        | No           | No         | No  |
| miR408               | 21–22      | U (66%)   | No     | Yes                | Yes      | Yes            | Yes       | Yes          | Yes        | Yes |
| <b>Non-conserved</b> |            |           |        |                    |          |                |           |              |            |     |
| miR170               | 21–22      | U (100%)  | No     | No                 | No       | No             | No        | No           | No         | Yes |
| miR827               | 22         | U (100%)  | No     | No                 | No       | Yes            | No        | No           | No         | No  |
| miR858               | 22         | U (100%)  | No     | No                 | No       | Yes            | Yes       | No           | No         | No  |
| miR894               | 20–21      | G/C(50%)  | No     | No                 | No       | Yes            | No        | No           | No         | No  |
| miR1030              | 19         | C (100%)  | No     | No                 | No       | Yes            | No        | No           | No         | No  |
| miR2950              | 21–22      | U (100%)  | Yes    | No                 | No       | No             | No        | No           | No         | Yes |

\*The column shows the reads encompassing the defined miRNA sequence ±2 nts.  
doi:10.1371/journal.pone.0019523.t001

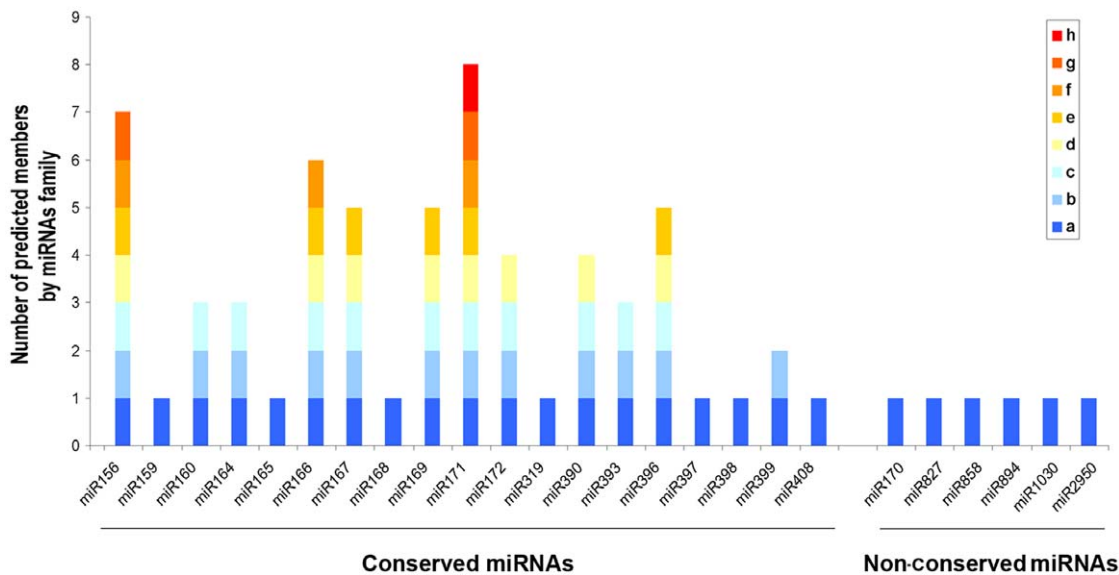

**Figure 2. Complexity of the known miRNA families identified in *C. sativus*.** Graphic representation of the different members of each conserved and non conserved miRNA family found in cucumber by sequencing and miRNA precursors prediction (miRCat). doi:10.1371/journal.pone.0019523.g002

[6–9,11,19]. The analysis of the average abundance of total cucumber sRNAs measured by the ratio of raw and unique sequences revealed that the 24-nt class exhibited high sequence diversity consistent with the widespread origins of sRNAs of this size along plant genomes. Surprisingly, the highest level of redundancy (6.68) was found within the 22 nt sRNA subset (Fig. 1, blue bars). This atypical situation, draws a parallel with the relatively high number of redundant 22-nt sequences obtained from *C. trifoliolate* by Solexa (Illumina) high-throughput sequencing [11].

**Identifying known miRNAs in *C. sativus***

Known miRNAs comprise both conserved and non-conserved miRNA species. In order to identify known miRNAs in our sequenced set of cucumber sRNAs, we compared the sequences recovered from our library with the repository of mature plant-miRNAs in miRBase (Release 16.0, September 2010; http://microrna.sanger.ac.uk) using the miRProf tool of the sRNA tool kit. Based on sequence homology our analysis revealed the presence of 25 known plant-miRNA families in our dataset (Table 1). The identified known-miRNAs corresponded to 19

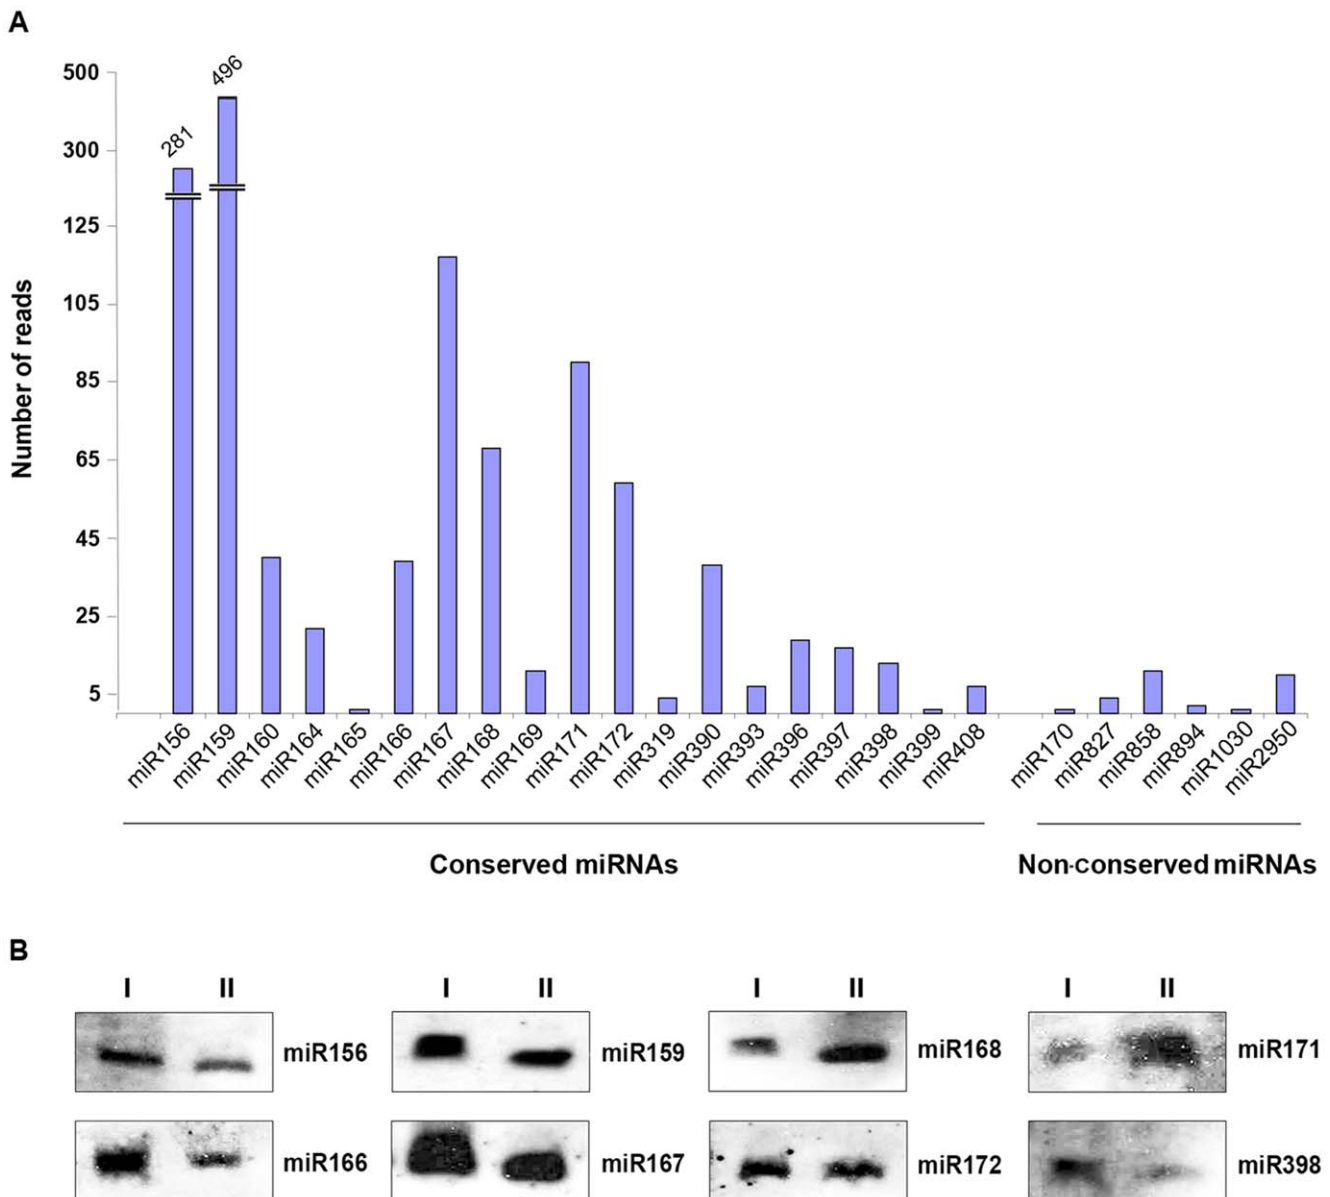

**Figure 3. Analysis of known miRNAs found in cucumber.** A) Graphic showing the number of sequences for each (conserved and non-conserved) miRNA family. The values on the y-axis represent the abundance of reads in the library. B) Detection of selected known cucumber miRNAs by Northern blot assays using non isotopic probes. I and II indicate plants maintained at 25°C and 30°C, respectively, resembling the plant growing conditions used for sRNAs library generation. doi:10.1371/journal.pone.0019523.g003

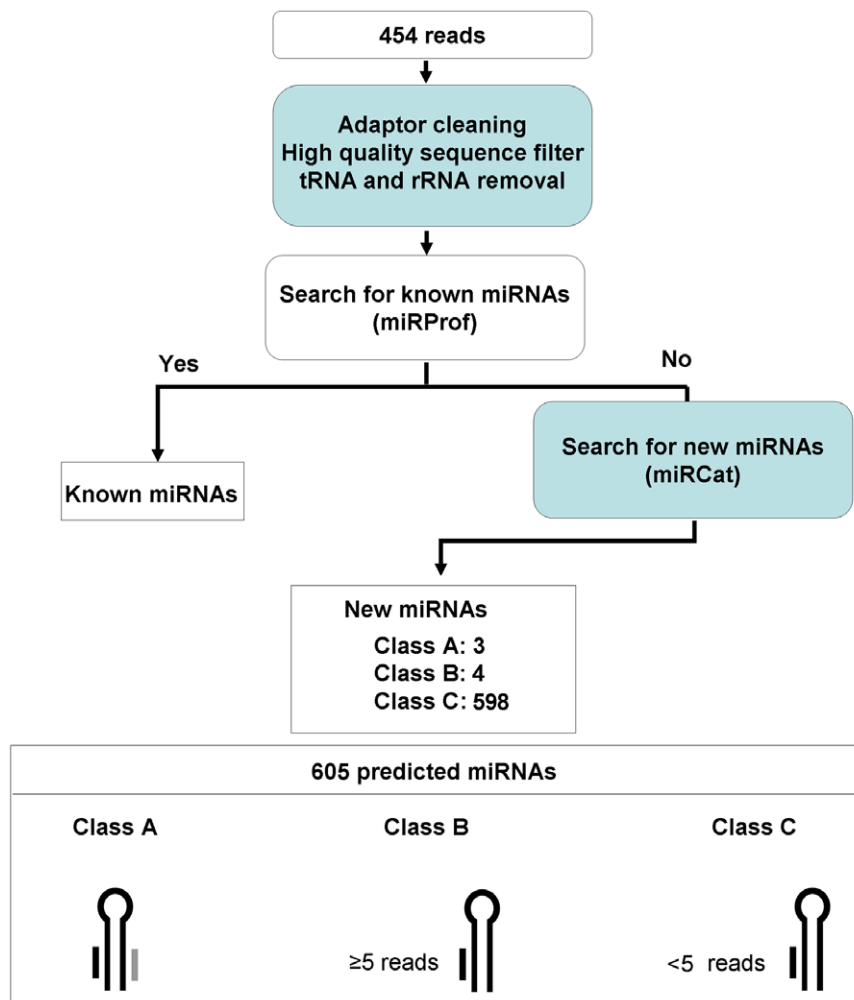

**Figure 4. Flowchart for the identification of new miRNAs on *C. sativus*.**  
doi:10.1371/journal.pone.0019523.g004

conserved (miR156, miR159, miR160, miR164, miR165, miR166, miR167, miR168, miR169, miR171, miR172, miR319, miR390, miR393, miR396, miR397, miR398, miR398 and miR408) and 6 known but non-conserved (miR170, miR827, miR858, miR894, miR1030 and miR2950) miRNA families. As expected, most of the miRNAs identified in cucumber were highly conserved in diverse plant species [20], suggesting that the ancient regulatory pathways mediated by evolutionary conserved miRNAs are also functional in cucumber plants. The stable expression level of a selected set of conserved miRNAs (miR159, miR167 and miR168) in diverse plant sectors across successive growing phases (Figure S1) strongly supports this idea.

Next, potential miRNA precursors of conserved cucumber miRNAs were identified by Blastn against the cucumber transcript database currently available at <http://www.phytozome.net/cucumber.php>. Secondary structure analysis revealed that pre-miRNAs holding characteristic secondary structures were predicted for 18 of the 25 miRNA families identified by sequence homology (Table S1). This finding added robustness to our data obtained by high throughput sequencing. The predicted hairpins have a free energy ranging from  $-37.76$  to  $-100.91$   $\Delta G$  and a predicted length ranging from 85 to 283 nts. The majority (12 out of 18) of the conserved miRNA families were composed by more than one member originating from different genomic loci, whereas

the totality of the non-conserved known miRNAs arises from a single locus (Fig. 2).

Since high-throughput sRNA sequencing provides the opportunity for quantitative profiling of sRNA populations, sequencing frequencies in our sequenced collection were employed as an estimation of miRNA abundance. Counting of redundant sRNA reads revealed that 14 out of 19 conserved miRNAs were represented with more than 10 reads in the cucumber data set; only miR165, miR399, miR319, miR393 and miR408 had less than ten reads. By contrast, less than 10 reads were counted for most known, non-conserved miRNA families; exceptions were miR858 and 2950 with more than 10 reads in the sequenced set (Fig. 3A). Next, to confirm their expression in cucumber, a representative group of conserved miRNAs were analyzed by Northern blot analysis. As observed in the Fig. 3B, the totality of the tested miRNA were readily detected in the leaves of cucumber plants maintained at two different temperatures (see material and methods) using non-isotopic hybridization techniques, suggesting that they were abundant as predicted by their respective sequencing frequencies.

#### Identifying new potential miRNAs in *C. sativus*

To discover additional non-conserved, cucumber-specific miRNA candidates within our sequenced set, unique small RNA

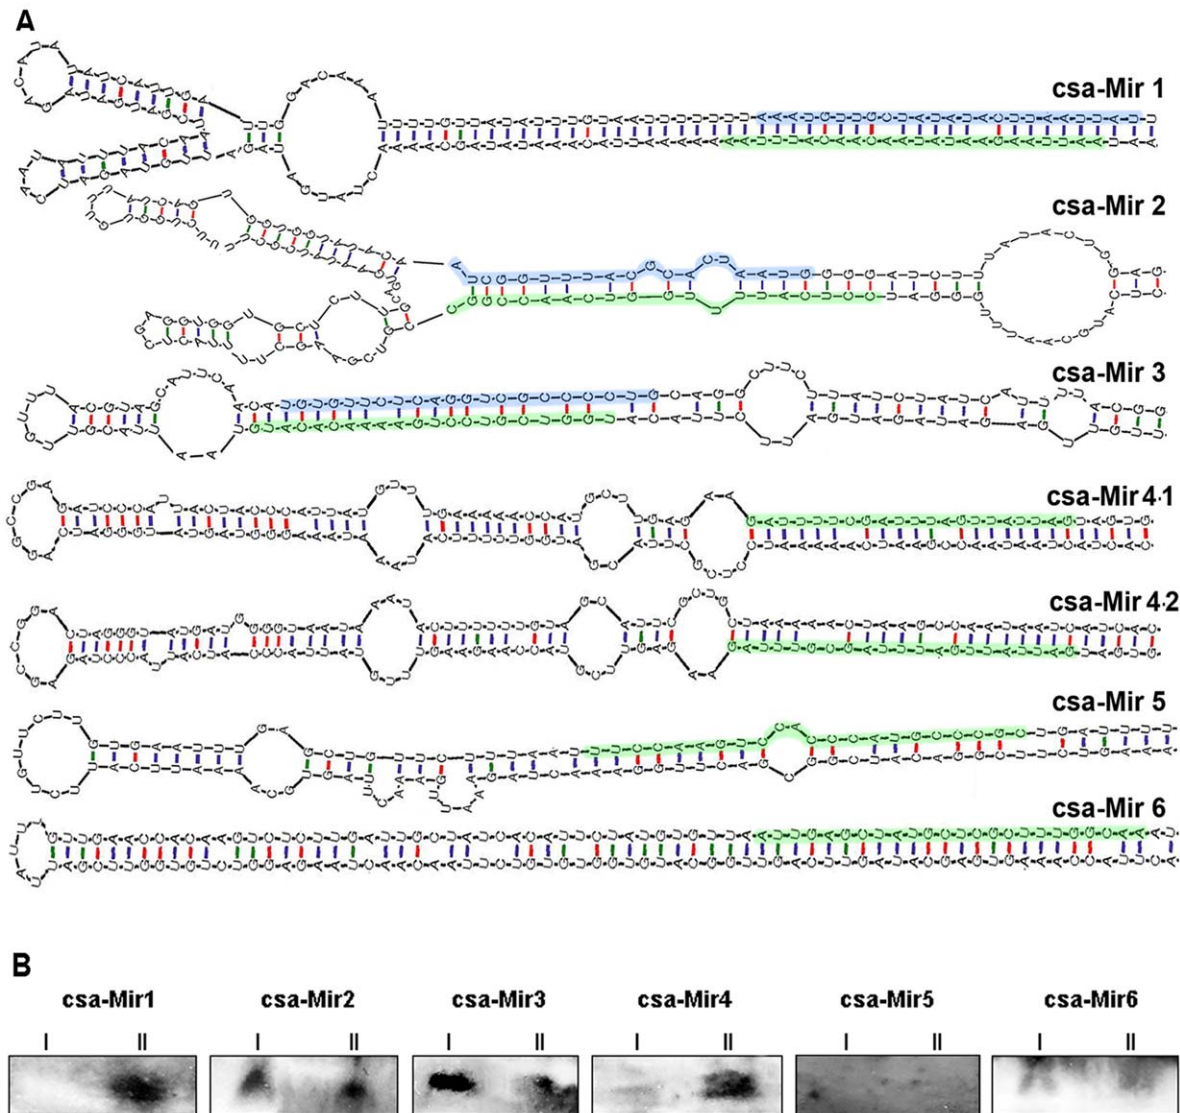

**Figure 5. Bioinformatics prediction and Northern blot detection of new *C. sativus* miRNAs.** A) Primary transcripts containing the predicted stem-loop structures precursor of new cucumber miRNAs. The mature miRNAs identified in cucumber sRNAs library are highlighted (green for miRNAs and blue for miRNAs\*). The size of the precursors may be slightly longer than represented. B) Low molecular-weight enriched-RNA was extracted from cucumber leaves, electrophoresed and transferred to nylon membranes. The novel cucumber miRNAs were detected by *Northern blot* assays using non isotopic probes. I and II indicate plants maintained at 25°C and 30°C, respectively, resembling the plant growing conditions used for sRNAs library generation.

doi:10.1371/journal.pone.0019523.g005

species were aligned against the *C. sativus* genome sequence in order to identify loci that may serve as putative precursors for miRNA. A total of 605 potential candidate new miRNAs were selected for further analysis and classified into three arbitrary categories. Class **A** comprised sRNAs that had their star counterpart sequenced; class **B** contained sRNAs that had been sequenced more than 5 times but were not supported by star counterparts; class **C** included rare sRNAs represented by less than five reads in the sequenced set (Fig. 4). Besides, sRNAs that hit the cucumber genome at more than 50 genomic loci were regarded as likely repeat-associated siRNAs and excluded from the analysis.

Our analysis revealed 7 possible miRNA sequences deriving from genomic loci with intramolecular folding capacity that resembled the characteristic and predictable local hairpin structures of miRNA precursors (Fig. 5A and Table 2). Three of

these candidate miRNAs (csa-miR1, csa-miR2 and csa-miR3) belonged to class **A**, and were considered as authentic miRNAs as they satisfactorily fulfilled the expression and biogenesis criteria (sequencing of miRNA\* strand) for miRNA annotation. The remaining four sequences belonged to class **B** (csa-miR4.1, csa-miR4.2, csa-miR5 and csa-miR6) and were considered as possible candidates because they apparently derived from stem-loop structures and were relatively abundant, but miRNA\* species were not sequenced. In accordance with that reported for other plant miRNAs, these newly identified miRNAs derive from predicted hairpin structures ranging from 134 to 230 nts long. The minimum free energies of these pre-miRNA hairpin structures ranged from  $-42.00$  to  $-97.90$   $\Delta G$ . The described cucumber miRNAs were potentially generated from 7 different loci (Table 2). The new miRNAs included in the class **A** (csa-miR1, csa-miR2

**Table 2.** Novel miRNAs found in *Cucumis sativus*.

| csa-MiR | Location                    | Orientation | Abundance | Sequence                 | Length (nt) | Hairpin Length (nt) | Minimum Free Energy | Class | miRNA *                     |
|---------|-----------------------------|-------------|-----------|--------------------------|-------------|---------------------|---------------------|-------|-----------------------------|
| 1       | scaffold03050:42052.42075   | +           | 1         | AATTAAGAATATAACAACATTAA  | 24          | 230                 | -67.60              | A     | AAATGTTGCTATATACTAAATTAT(1) |
| 2       | scaffold04026:144.163       | +           | 1         | CCTCATTTTGGTCAACCCGGC    | 20          | 155                 | -49.69              | A     | ATCGGTTTACGCCTACTAATG(1)    |
| 3       | scaffold03577:144799.144819 | +           | 10        | TGGTCGTCTGAAACACATG      | 21          | 134                 | -42.00              | A     | TGTGTTCTCAGGTCGCCCTG(8)     |
| 4_1     | scaffold01087:76.96         | +           | 6         | GAAGGCTGTGATGATTATGA     | 21          | 223                 | -97.90              | B     | NO                          |
| 4_2     | scaffold04146:100.120       | +           | 6         | GAAGGCTGTGATGATTATGA     | 21          | 225                 | -94.50              | B     | NO                          |
| 5       | scaffold02633:580263.580284 | -           | 10        | TTCCAAGTCCACCCATGCCCGC   | 22          | 185                 | -72.10              | B     | NO                          |
| 6       | scaffold01374:173181.173204 | -           | 59        | ATTGAGCTATGCTCGCTTTGGCAA | 24          | 196                 | -91.00              | B     | NO                          |

\*Location of the miRNA sequence on the cucumber genome, indicating the scaffold from which the miRNA derives and the start and end position. doi:10.1371/journal.pone.0019523.t002

and csa-miR3) and the candidates (class **B**) miRNAs (csa-miR5 and csa-miR6) each arose from a single locus, in good agreement with most species-specific miRNAs detected in other plant species. The candidate csa-miR4 is predicted to be produced from two loci. As expected, none of the new described cucumber-miRNAs was found to be clustered (data not shown), since this organization pattern (common in animals) is infrequent in plants, with the exception of some species like soybean, grapevine or tobacco [10,21,22]. To validate their prediction and examine their expression we analyzed leaves of cucumber plants maintained at 25°C and 30°C temperatures both resembling the plant growing conditions used during the sRNAs library generation. The new cucumber miRNAs were subjected to sRNA hybridization analysis against non-isotopic riboprobes (Fig. 5B). All the Class **A** cucumber-specific miRNAs (csa-miR1, csa-miR2 and csa-miR3) and 2 Class **B** candidate-miRNAs (csa-miR4 and csa-miR6) were detected by Northern blot assays, providing additional robustness to our prediction. The candidate csa-miR5, that shows a low intensity signal at high exposition times, was considered as undetected.

### Prediction of miRNA targets in *C. sativus*

With the aim to better understand the biological functions of the newly identified as well as known (conserved and non-conserved) *C. sativus* miRNAs, we searched for putative target genes by using the plant target prediction tool of the sRNA tools (<http://srna-tools.cmp.uea.ac.uk/plant/cgi-bin/srna-tools>) and the *C. sativus* transcript database (<http://www.phytozome.net/cucumber.php>) as the reference set. As a result, we found putative target genes for 1 out of 3 new cucumber miRNAs and for 2 out of 3 candidate cucumber miRNAs (Table 3). Since, the recently sequenced cucumber genome has not been functionally annotated yet, we searched for homologous proteins for these cucumber transcripts in the NCBI protein-database ([www.ncbi.nlm.nih.gov](http://www.ncbi.nlm.nih.gov)) in order to infer the biological functions of their predicted targets. The known proteins, homologous to the putative targets genes, appear to be involved in a wide variety of biological processes (Table 3). For example, the predicted csa-miR2 target was a gene coding a tetratricopeptide repeat-containing protein, a kind of protein involved in protein-protein and/or protein-RNA interactions. Candidate csa-miR4/1 and 4/2 had two predicted targets, a nodulin similar to MtN21 family protein which are related to vascular tissue development, nodule formation and transport functions, and a clathrin binding protein involved in plant endocytosis. Csa-miR5 targets are R-FOM2, a resistance gene to *Fusarium oxysporum* f.sp. *melonis* from *C. melo*, and a r2r3-myb transcription factor which plays important roles in the regulation of many secondary metabolites at the transcriptional level. To obtain more complete information, we blasted against the cucumber draft genome the potential cucumber specific miRNAs with unpredicted target in the coding transcriptome. This analysis revealed that csa-Mir1 and csa-Mir6 possess highly homology (>91%) with diverse RNA regions not identified as protein coding (data not shown). No homologous region (except the corresponding to miRNA precursor) was identified in the cucumber genome for csa-Mir3.

Next, we explored the *C. sativus* transcript database searching for predicted target genes of the previously known cucumber miRNAs described in this study. Putative targets were found in the cucumber transcriptome for the majority of these conserved and non-conserved known miRNAs (Table 4). Additionally, we compared for a representative set of conserved cucumber miRNAs, the target genes predicted in cucumber with the previously reported targets. As expected, all of these miRNAs share putative target genes with their homologous miRNAs in other plant-species (data not shown), reinforcing the idea that

**Table 3.** Predicted targets of new cucumber miRNAs.

| miRNA | <i>C. sativus</i> target gene accession | start-end position of target | Target translation                                            | Specie     |
|-------|-----------------------------------------|------------------------------|---------------------------------------------------------------|------------|
| 1     | No target found                         |                              |                                                               |            |
| 2     | Cucsa.328090.2                          | 147–166                      | Tetratricopeptide repeat (TPR)-containing protein (AT1G77230) | A.thaliana |
| 3     | No target found                         |                              |                                                               |            |
| 4_1   | Cucsa.250100.1                          | 860–876                      | Nodulin MtN21 family protein (AT5G64700)                      | A.thaliana |
| 4_1   | Cucsa.395290.1                          | 1435–1448                    | Clathrin binding protein (At5g11710)                          | A.thaliana |
| 4_2   | Cucsa.250100.1                          | 860–876                      | Nodulin MtN21 family protein (AT5G64700)                      | A.thaliana |
| 4_2   | Cucsa.395290.1                          | 1435–1448                    | Clathrin binding protein (At5g11710)                          | A.thaliana |
| 5     | Cucsa.251930.1                          | 592–613                      | R-FOM-2 gene                                                  | C.melo     |
| 5     | Cucsa.368410.1                          | 733–754                      | r2r3-myb transcription factor, putative                       | R.communis |
| 6     | No target found                         |                              |                                                               |            |

doi:10.1371/journal.pone.0019523.t003

conserved plant-miRNAs are involved in essential biological processes.

## Discussion

Micro RNAs are key components of most of the regulatory events mediated by RNA silencing in animal and plants [23–25]. Although the development of high-throughput sequencing methods have contributed to detecting new as well as evolutionary conserved miRNAs [26], most of the species-specific miRNAs that frequently have low or tissue specific expression levels remain yet unidentified. By taking advantage of the recent completion of the sequence of the cucumber genome, the aim of this work was to identify the evolutionary conserved and new cucumber-specific miRNAs present in a *C. sativus* sRNAs population recovered from a cDNA library of cucumber sRNAs [17]. Our data indicated that cucumber sRNA of 24 nt dominated the pool of unique species as observed for many other herbaceous species such as *A. thaliana*, *M. truncatula* and *S. lycopersicum* where 24 nts length were the most represented sRNAs [6–9,19]. This high proportion of 24-nt class sRNAs in annual plants could be consequence of an active state of heterochromatin transcriptional silencing (mediated by 24-nt sRNAs) rapidly established at each generation [10]. It has been hypothesized that MIR genes originate by gene duplication events followed by random mutation processes to evolve in multiples imperfectly paired hairpins [5,27]. Consequently, ancient evolutionary conserved miRNAs are represented by multiple MIR genes whereas non-conserved miRNAs (believed to be evolutionary recent) are generally originated from a single locus. The search for known miRNAs in cucumber has revealed a total of 25 (19 conserved and 6 non-conserved) miRNA families homologous to miRNAs sequences present on miRBase. Similarly to the results reported in other deep sequencing studies [9–11] diverse conserved miRNAs were not found in cucumber sRNAs data set. This situation could be explained keeping in mind that some of the conserved miRNAs reported to date are tissue-specific or accumulated in response to stress and thus, not necessarily represented in our leaf library. As expected, the great majority of the evolutionary conserved miRNAs were represented by more than one member, whereas non-conserved miRNAs identified in this study were represented by a single MIR gene.

In addition, three new cucumber miRNAs (csa-miRNAs), supported by their miRNA\* strands have been identified in our *C. sativus* sRNA libraries. Another four miRNAs remain as

plausible candidates as their antisense sequences could not be isolated. Moreover, 5 of these csa-miRNAs were validated by northern blot detection, which is an important requisite for the identification of new miRNAs. Based on BLASTn search against the cucumber genome and hairpin structure prediction, we identified genomic sources of miRNA and potential precursors for the totality of the new and candidate csa-miRNAs. These miRNAs are potentially generated from 7 loci and, as commonly observed in other plants, do not form transcriptional clusters. Since these miRNAs were not similar to any known miRNAs, they might be involved in more specific processes in cucumber. Unfortunately, we were not able to determine their DCL1 dependence because cucumber *dcl1* mutants are currently not available.

The majority of the new cucumber miRNAs identified here showed the canonical size expected for sRNAs derived from DCL1 processing, although sequence variants that possessed shortened or lengthened 5' or 3' ends were also found. For instance, csa-miR3 and csa-miR4 were 21-nt long, consistent with canonical DCL1 products, whereas csa-miR2 (20 nt) and csa-miR5 (22 nt) showed a very little size variation, perhaps due to inaccuracy of DCL1 processing [7]. Only two cucumber miRNAs (cas-miR1 and cas-miR6 - 24 nt) showed unexpected sizes. This situation could be similar to that previously observed in *Arabidopsis*, where diverse miRNA families are also independently processed by DCL3 to generate a new class of *bona fide* (23–25 nt) miRNAs with no canonical size, called long miRNAs [28]. Additionally, it was also reported that the accumulation of long miRNAs in *A. thaliana* was inversely proportional to the level of miRNA conservation and exhibit organ-specific expression patterns [28]. A similar situation was recently reported for miRNAs recovered from different grapevine tissues [10]. Future studies are necessary to determine if alternative and tissue-specific DCL processing of miRNA precursors also occur during *C. sativus* miRNA biogenesis.

Species-specific miRNAs are believed to be recently evolved and, in general, expressed at levels lower than those of strictly conserved miRNAs [5–7,10,29]. Our quantitative data obtained from sequencing frequencies of conserved and non-conserved miRNAs accommodates well to this prediction, and indicates that new cucumber miRNAs exhibit residual accumulation in the tissue tested. In comparison to recent reports in other plant species such as grapevine [10], Populus [30] or Medicago [9] the number the potential specie-specific miRNAs found in cucumber (3 specific miRNAs with \*miRNA sequence) was considerably low. Although



**Table 4.** Predicted targets of conserved and non-conserved cucumber miRNAs.

| miRNA                | Targeted Genes                                                                                                                 | Targeted Protein                            |
|----------------------|--------------------------------------------------------------------------------------------------------------------------------|---------------------------------------------|
| <b>Conserved</b>     |                                                                                                                                |                                             |
| <b>miR156</b>        | Cucsa.054050.1, Cucsa.113410.2, Cucsa.157230.1, Cucsa.198630.1, Cucsa.242790.1, Cucsa.392170.1, Cucsa.349620.1, Cucsa.259800.1 | Squamosa promoter binding protein           |
|                      | Cucsa.291270.1                                                                                                                 | Cationic amino acid transporter             |
|                      | Cucsa.303890.4                                                                                                                 | Short-chain dehydrogenase                   |
|                      | Cucsa.350960.1, Cucsa.278470.1                                                                                                 | Unknown                                     |
| <b>miR159</b>        | Cucsa.094180.1, Cucsa.121070.1, Cucsa.148580.1, Cucsa.364400.1, Cucsa.094180.1, Cucsa.121070.1, Cucsa.364400.1, Cucsa.148580.1 | R2R3-MYB transcription factor               |
|                      | Cucsa.047860.3, Cucsa.111880.2                                                                                                 | TCP transcription factor                    |
|                      | Cucsa.273670.1                                                                                                                 | BRASSINAZOLE-RESISTANT 2 protein            |
|                      | Cucsa.283050.1                                                                                                                 | ARIADNE-like protein                        |
|                      | Cucsa.283050.1                                                                                                                 | pre-miRNA 395e                              |
|                      | Cucsa.273440.1                                                                                                                 | Hypothetical                                |
|                      | Cucsa.302420.2                                                                                                                 | Unknown                                     |
| <b>miR160</b>        | Cucsa.308310.1                                                                                                                 | miR160c gene                                |
| <b>miR164</b>        | Cucsa.040380.1                                                                                                                 | NAC transcription factor                    |
|                      | Cucsa.122890.1                                                                                                                 | CUC transcription factor                    |
|                      | Cucsa.032500.1, Cucsa.112890.1, Cucsa.158180.2, Cucsa.197830.1, Cucsa.338700.3                                                 | NAM transcription factor                    |
| <b>miR165</b>        | Cucsa.048220.1                                                                                                                 | PHB transcription factor                    |
|                      | Cucsa.167110.5, Cucsa.385410.3, Cucsa.386080.9                                                                                 | Class III HD-Zip protein                    |
| <b>miR166</b>        | Cucsa.341260.1                                                                                                                 | PRA-7 protein                               |
| <b>miR167</b>        | Cucsa.047990.2, Cucsa.152170.3, Cucsa.173450.1                                                                                 | Auxin response factor                       |
|                      | Cucsa.097070.2                                                                                                                 | Magnesium/proton exchanger                  |
|                      | Cucsa.139150.1                                                                                                                 | CDC6                                        |
|                      | Cucsa.160570.1                                                                                                                 | MYB transcription factor                    |
| <b>miR168</b>        | No target found                                                                                                                |                                             |
| <b>miR169</b>        | Cucsa.055300.1                                                                                                                 | Tubulin gamma complex-associated protein    |
| <b>miR171</b>        | Cucsa.120600.1, Cucsa.201250.1                                                                                                 | Scarecrow-like transcription factor         |
|                      | Cucsa.320850.2                                                                                                                 | GRAS transcription factor                   |
| <b>miR172</b>        | Cucsa.065640.1, Cucsa.102550.1, Cucsa.165940.1, Cucsa.307230.1                                                                 | Apetala 2 transcription factor              |
|                      | Cucsa.385890.1                                                                                                                 | pre-miRNA 172a                              |
| <b>miR319</b>        | Cucsa.283050.1                                                                                                                 | miR395e primary transcript                  |
|                      | Cucsa.302420.2                                                                                                                 | Zinc finger protein                         |
|                      | Cucsa.364400.1                                                                                                                 | MYB transcription factor                    |
| <b>miR390</b>        | Cucsa.089280.1                                                                                                                 | ZEITLUPE protein                            |
|                      | Cucsa.164200.1                                                                                                                 | Luciferin-rich repeat receptor-like protein |
| <b>miR393</b>        | Cucsa.156100.1                                                                                                                 | Auxin signaling f-box 2                     |
|                      | Cucsa.196530.1                                                                                                                 | Dead box ATP-dependent RNA helicase         |
| <b>miR396</b>        | No target found                                                                                                                |                                             |
| <b>miR397</b>        | Cucsa.066920.1, Cucsa.067060.1, Cucsa.124400.1, Cucsa.146870.1, Cucsa.175530.1, Cucsa.176130.1                                 | Laccase                                     |
|                      | Cucsa.266970.1                                                                                                                 | Ubiquitin                                   |
| <b>miR398</b>        | No target found                                                                                                                |                                             |
| <b>miR399</b>        | No target found                                                                                                                |                                             |
| <b>miR408</b>        | Cucsa.077170.1, Cucsa.033180.1, Cucsa.049510.1                                                                                 | Cooper ion binding (Plantacyanin)           |
|                      | Cucsa.271070.1                                                                                                                 | P1b-ATPase                                  |
| <b>Non-conserved</b> |                                                                                                                                |                                             |
| <b>miR170</b>        | No target found                                                                                                                |                                             |
| <b>miR827</b>        | No target found                                                                                                                |                                             |

**Table 4.** Cont.

| miRNA          | Targeted Genes                                                                                 | Targeted Protein                      |
|----------------|------------------------------------------------------------------------------------------------|---------------------------------------|
| <b>miR858</b>  | Cucsa.096800.1, Cucsa.365190.1, Cucsa.340790.2, Cucsa.107730.1, Cucsa.107740.2, Cucsa.006170.1 | R2R3 MYB transcription factor         |
| <b>miR894</b>  | Cucsa.302080.1                                                                                 | Acid invertase                        |
|                | Cucsa.103010.1                                                                                 | RNA binding protein                   |
|                | Cucsa.195680.2                                                                                 | Chloroplast protease                  |
| <b>miR1030</b> | Cucsa.254940.1                                                                                 | TZP; DNA binding/nucleic acid binding |
|                | Cucsa.103950.2, Cucsa.034730.1                                                                 | Chromosome condensation protein-like  |
|                | Cucsa.298340.1                                                                                 | Trypsin inhibitor 5                   |
| <b>miR2950</b> | Cucsa.010860.2                                                                                 | APK1A                                 |
|                | Cucsa.022840.1                                                                                 | Acetolactate synthase                 |
|                | Cucsa.253640.1                                                                                 | DEAD box RNA helicase                 |
|                | Cucsa.271250.1                                                                                 | F-box family protein                  |
|                | Cucsa.097890.1                                                                                 | WRKY transcription factor             |
|                | Cucsa.310310.1                                                                                 | Clathrin assembly protein             |

doi:10.1371/journal.pone.0019523.t004

this observation could be used as a preliminary evidence that in cucumber the regulatory network mediated by specific miRNAs could be less complex than in other species, the tissue-specific nature of our library (leaves of adult plants) can again explain this low number.

Potential targets, with a wide variety of predicted functions, were identified for 4 potential new cucumber miRNAs. In concordance with previous reports most of the targets found in the cucumber transcriptome were plant specific factors related with the transcription machinery, such as the members of the MYB family (*r2r3-myb*) or regulatory proteins involved in protein-protein and/or protein-RNA interactions. The biological importance of the potential regulation of these cucumber genes by miRNAs needs further studies. Surprisingly, for 3 new miRNAs (*csa-miR1*, *csa-miR3* and *csa-miR6*) predicted targets in the *C. sativus* transcriptome could not be found. However, homologous regions, candidates to be potential targets for *csa-Mir1* and *csa-Mir6* were identified in non-coding genomic regions. This observation opened the possibility that these specific miRNAs could regulate the expression of cucumber non-coding RNAs, and consequently be involved in a more complex regulatory pathway related to epigenetic processes [31]. Nevertheless, the possibility that the target regions found in the recently sequenced cucumber genome are not yet correctly annotated or that the cucumber transcript dataset was still incomplete can not be ruled out. Future studies are necessary to elucidate the functional importance of these *csa-miRNAs*. Finally, the highly restrictive algorithms used in this approach [32] could fail to identify the potential targets for some miRNAs (maybe because the existence of mismatches between the miRNA and their target), resembling the recently observed for the miR398 in *Arabidopsis* [33].

In summary, in this study we have identified, for the first time, conserved, known non-conserved and new miRNAs in cucumber, using a combined approach of high throughput sequencing and bioinformatics prediction of MIR precursors. In addition, a significant number of these miRNAs were validated by northern blot hybridization fulfilling the requirements necessary to the annotation of new plant-miRNAs [12,13].

## Materials and Methods

### Small RNA library information

The sequences used in this work were obtained from a library generated starting from a sRNAs population recovered from leaves and phloem exudate of healthy and *Hop stunt viroid*-infected cucumber (*C. sativus*) plants and sequenced by 454 Life Science Technology (Lifesequencing, Branford, CT, USA; www.lifesequencing.com) ([17]-NCBI/SRA accession code SRP001408).

### Bioinformatics analysis of sRNA sequences and targets prediction

Adapter trimming and cleaning of the 454 reads obtained from leaves of non-infected cucumber plants were performed by Perl scripts locally developed by the Bioinformatics Service at the Instituto de Biología Molecular y Celular de Plantas (IBMCP), Valencia, Spain (<http://www.ibmcp.upv.es>). Next, rRNA, tRNA, snRNA and snoRNA derived sequences were removed from our sRNAs dataset; the remaining sequences were used in this study. The unique sRNA sequences were employed to analyze the sRNAs accumulation profiles and to identify in the miRNA database (miRBase 13.0) known (conserved and non-conserved) miRNAs in cucumber. The sequences ranging the canonical miRNA length  $\pm 2$  nt were considered to be known miRNAs.

To study potential precursors of new cucumber miRNAs, the sRNA sequences recovered from our library were aligned with the *C. sativus* transcript database (<http://www.phytozome.net/cucumber.php>) and then were processed by miRCat from the small RNA toolkit from the University of East Anglia (<http://srna-tools.cmp.uea.ac.uk/plant/cgi-bin/srna-tools.cgi>). The resulting structures, with minimal matched nucleotide pairs of miRNA and miRNA\* exceeding 16 nt and with maximal size differences of miRNA and miRNA\* up to 4 nt, were retained as new miRNA candidates. The sequence of the targets from *C. sativus* were searched against the protein database of the NCBI (National Center for Biotechnology Information, <http://www.ncbi.nlm.nih.gov/>) using the blastx (translated nucleotide search against protein database) option of the blast search.

## RNA isolation and Northern blot assays

Cucumber plants were maintained in environmentally controlled growing chambers at two different temperatures 30°C and 25°C, resembling the growing conditions used for sRNAs library generation [17]. Total RNA was extracted from leaves using TRI reagent (Sigma, St. Louis, MO, USA) according to the manufacturer's instructions. The low-molecular-weight RNA fraction was enriched using the miRNA Isolation Kit MIRACLE (Stratagene, La Jolla, CA, USA). Low molecular-weight enriched-RNA was loaded onto 20% polyacrylamide gels with 0.25× TBE and 8 M urea. RNA was transferred to a nylon membrane (Roche Diagnostics GmbH). Hybridization using different digoxigenin-labelled RNA as a probe was performed as described previously [34].

## Supporting Information

**Figure S1 Northern blot detection of miR159, miR167 and miR168 in cucumber plants.** The leaves were collected

weekly from 4 (one group for week) independent groups of 3 different plants and pooled, before the RNA extraction. The samples were recovered at 5, 6, 7 and 8 weeks after germination (lanes 1 to 4, respectively). The 3 different plant sectors analyzed (apex, young leaves and old leaves) correspond to: first leaves and apical meristem (apex), third leaves from the shoot apex (young leaves) and fifth leaves from the shoot apex (old leaves). (JPG)

**Table S1 Conserved and known but non-conserved miRNA families predicted by miRCat in cucumber transcriptome.** (DOC)

## Author Contributions

Conceived and designed the experiments: GG VP. Performed the experiments: GM. Analyzed the data: GM CL GG. Contributed reagents/materials/analysis tools: JF. Wrote the paper: GM VP GG.

## References

- Llave C, Xie Z, Kasschau KD, Carrington JC (2002) Cleavage of Scarecrow-like mRNA targets directed by a class of Arabidopsis miRNA. *Science* 297: 2053–2056.
- Reinhart BJ, Weinstein EG, Rhoades MW, Bartel B, Bartel DP (2002) MicroRNAs in plants. *Genes Development* 16: 1616–1626.
- Xie Z, Khanna K, Ruan S (2010) Expression of microRNAs and its regulation in plants. *Seminars in Cell & Developmental Biology* 21: 790–797.
- Jones-Rhoades MW, Bartel DP, Bartel B (2006) MicroRNAs and their regulatory roles in plants. *Annual Review of Plant Biology* 57: 19–53.
- Allen E, Xie Z, Gustafson AM, Sung GH, Spatafora JW, et al. (2004) Evolution of microRNA genes by inverted duplication of target gene sequences in *Arabidopsis thaliana*. *Nature Genetics* 36: 1282–1290.
- Fahlgrén N, Howell MD, Kasschau KD, Chapman EJ, Sullivan CM, et al. (2007) High-throughput sequencing of *Arabidopsis* microRNAs: evidence for frequent birth and death of MIRNA genes. *PLoS ONE* 2: e219.
- Rajagopalan R, Vaucheret H, Trejo J, Bartel DP (2006) A diverse and evolutionarily fluid set of microRNAs in *Arabidopsis thaliana*. *Genes Development* 20: 3407–3425.
- Moxon S, Jing R, Szittyta G, Schwach F, Rusholme Pilcher RL, et al. (2008) Deep sequencing of tomato short RNAs identifies microRNAs targeting genes involved in fruit ripening. *Genome Research* 18: 1602–1609.
- Szittyta G, Moxon S, Santos DM, Jing R, Feveireiro MP, et al. (2008) High-throughput sequencing of *Medicago truncatula* short RNAs identifies eight new miRNA families. *BMC Genomics* 9: 593.
- Pantaleo V, Szittyta G, Moxon S, Miozzi L, Moulton V, et al. (2010) Identification of grapevine microRNAs and their targets using high-throughput sequencing and degradome analysis. *Plant Journal* 62: 960–976.
- Song C, Wang C, Zhang C, Korir NK, Yu H, et al. (2010) Deep sequencing discovery of novel and conserved microRNAs in trifoliate orange (*Citrus trifoliata*). *BMC Genomics* 11: 431.
- Ambros V, Bartel B, Bartel DP, Burge CB, Carrington JC, et al. (2003) A uniform system for microRNA annotation. *RNA* 9: 277–279.
- Meyers BC, Axtell MJ, Bartel B, Bartel DP, Baulcombe D, et al. (2008) Criteria for annotation of plant MicroRNAs. *Plant Cell* 20: 3186–3190.
- Tanurdzic M, Banks JA (2004) Sex-determining mechanisms in land plants. *Plant Cell* 16 Suppl: S61–71.
- Lough TJ, Lucas WJ (2006) Integrative plant biology: role of phloem long-distance macromolecular trafficking. *Annual Review of Plant Biology* 57: 203–232.
- Huang S, Li R, Zhang Z, Li L, Gu X, et al. (2009) The genome of the cucumber, *Cucumis sativus* L. *Nature Genetics* 41: 1275–1281.
- Martinez G, Donaire L, Llave C, Pallas V, Gomez G (2010) High-throughput sequencing of Hop stunt viroid-derived small RNAs from cucumber leaves and phloem. *Molecular Plant Pathology* 11: 347–359.
- Moxon S, Schwach F, Dalmay T, Maclean D, Studholme DJ, et al. (2008) A toolkit for analysing large-scale plant small RNA datasets. *Bioinformatics* 24: 2252–2253.
- Morin RD, Aksay G, Dolgosheina E, Ebhardt HA, Magrini V, et al. (2008) Comparative analysis of the small RNA transcriptomes of *Pinus contorta* and *Oryza sativa*. *Genome Research* 18: 571–584.
- Sunkar R, Zhou X, Zheng Y, Zhang W, Zhu JK (2008) Identification of novel and candidate miRNAs in rice by high throughput sequencing. *BMC Plant Biology* 8: 25.
- Frazier TP, Xie F, Freistaedter A, Burklew CE, Zhang B (2010) Identification and characterization of microRNAs and their target genes in tobacco (*Nicotiana tabacum*). *Planta* 232: 1289–1308.
- Wang Y, Li P, Cao X, Wang X, Zhang A, et al. (2009) Identification and expression analysis of miRNAs from nitrogen-fixing soybean nodules. *Biochem Biophys Res Commun* 378: 799–803.
- Poethig RS (2009) Small RNAs and developmental timing in plants. *Current Opinion in Genetics & Development* 19: 374–378.
- Voinnet O (2009) Origin, biogenesis, and activity of plant microRNAs. *Cell* 136: 669–687.
- Husbands AY, Chitwood DH, Plavskin Y, Timmermans MC (2009) Signals and prepatterns: new insights into organ polarity in plants. *Genes & Development* 23: 1986–1997.
- Shabalina SA, Koonin EV (2008) Origins and evolution of eukaryotic RNA interference. *Trends in Ecology & Evolution* 23: 578–587.
- Axtell MJ, Bowman JL (2008) Evolution of plant microRNAs and their targets. *Trends in Plant Science* 13: 343–349.
- Vazquez F, Blevins T, Ailhas J, Boller T, Meins F, Jr. (2008) Evolution of *Arabidopsis* MIR genes generates novel microRNA classes. *Nucleic Acids Research* 36: 6429–6438.
- Yao Y, Guo G, Ni Z, Sunkar R, Du J, et al. (2007) Cloning and characterization of microRNAs from wheat (*Triticum aestivum* L.). *Genome Biology* 8: R96.
- Klevebring D, Street NR, Fahlgrén N, Kasschau KD, Carrington JC, et al. (2009) Genome-wide profiling of populus small RNAs. *BMC Genomics* 10: 620.
- Rymarquis LA, Kastenmayer JP, Huttenhofer AG, Green PJ (2008) Diamonds in the rough: mRNA-like non-coding RNAs. *Trends in Plant Science* 13: 329–334.
- Alves L, Jr., Niemeier S, Hauenschild A, Rehmsmeier M, Merkle T (2009) Comprehensive prediction of novel microRNA targets in *Arabidopsis thaliana*. *Nucleic Acids Research* 37: 4010–4021.
- Beauchair L, Yu A, Bouche N (2010) microRNA-directed cleavage and translational repression of the copper chaperone for superoxide dismutase mRNA in *Arabidopsis*. *Plant Journal* 62: 454–462.
- Gomez G, Pallas V (2007) Mature monomeric forms of Hop stunt viroid resist RNA silencing in transgenic plants. *Plant Journal* 51: 1041–1049.
